# Supplementary material
Source: PubMed Central journal article supplement (PMC3135815)
Supplement: mmc1.pdf [file mmc1.pdf]

The American Journal of Human Genetics, Volume 89

**Supplemental Data**

**Expansion of Intronic GGCCTG Hexanucleotide Repeat  
in *NOP56* Causes SCA36, a Type of Spinocerebellar Ataxia  
Accompanied by Motor Neuron Involvement**

Hatasu Kobayashi, Koji Abe, Tohru Matsuura, Yoshio Ikeda, Toshiaki Hitomi, Yuji Akechi, Toshiyuki Habu, Liu Wanyang, Hiroko Okuda, and Akio Koizumi

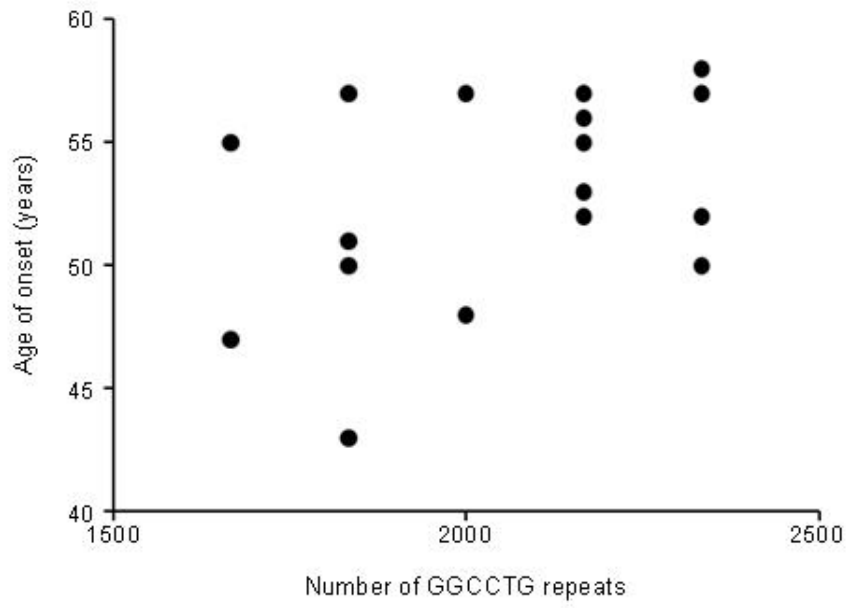

**Figure S1. Correlation of the Number of Repeats with Age of Onset**

A scatter plot shows no negative correlation between GGCCTG repeat number and onset age (n=17, r=0.42, p=0.09).

**Table S1. Primers Used for Amplification of Candidate Genes (Human Build 37.1)**

|                  |                                              |                         |                        |
|------------------|----------------------------------------------|-------------------------|------------------------|
| <i>PDYN</i>      | exon 3                                       | CTTTGGCCTCTGCTTACCT     | TCCAGGCCATCTATAGGGCA   |
|                  | exon 4                                       | TCCCCTACCTTTATGCAACCA   | AACATACTCCCACCGCAGAAGA |
| <i>STK35</i>     | exon 1                                       | CGGATCACGGGAATTTCCG     | ATTGGCTGAAAAGTTCGGCT   |
|                  | exon 2                                       | TGGCTTCCGCTTAAAGGG      | CAGGAAAGGAGGGTGTGTCA   |
|                  | exon 3                                       | GTCCCTTGGAGCAAGTGTGTT   | AATCACTTGAAGTTCGGGAGGT |
|                  | exon 5                                       | TCTCTTTAGAGCTCTGCCCA    | TTGCCACATTGAATTTCTT    |
| <i>TGM3</i>      | exon 1                                       | TTATTAATCTGCCCTTCTCC    | CTCTGGCTAGCACCTAAAT    |
|                  | exon 3                                       | AACAGGATGCACAGAGTTC     | TCCCTCTGATTTGAGGATGG   |
|                  | exon 4                                       | TGGCTGTATGTTTGTCCA      | TTGGGGCTTGGAGAGATAGAA  |
|                  | exon 5                                       | TCAGGGGAGGGCTAAAGGT     | AGGTGGCCAAATGAAAAGTCTT |
|                  | exon 6                                       | TTCTCTGGTCTTCCGCAAT     | TGTAAAGAGTGTGGTGCCTA   |
|                  | exon 7,8                                     | TTCAAATCATGGCTTTGGCT    | AATCAACATGGCAAGAGT     |
|                  | exon 9                                       | TGTTGTATGCTGCACTGTG     | TTGTTTAAATCCCATCATGCA  |
|                  | exon 10                                      | GGTTGCAATGGTCTGGAA      | GCAATCCTATCATTCAGGCA   |
|                  | exon 11                                      | TGAAAGTCGAATGCCTGCTA    | TCCAAAGCATTAATACATGGC  |
|                  | exon 12                                      | AGATCTCCCAACCAAGCTCA    | AAAACTCTCTTTGCCCTCTG   |
|                  | exon 13                                      | TCTCCCTTCTTCAATCCTCA    | CCAAACCAAAATGCAAAAGCA  |
|                  | exon 14                                      | CTCCAACAACAAGGACAGGA    | CACTCCCTTTGGCAATTGAA   |
| <i>TGM6</i>      | exon 1                                       | TGATTTGTGTCTGTGGGTG     | AGTTCATGTGTCTGTGGGA    |
|                  | exons 2,3                                    | ATGAACAAATGACTGGCCGA    | TAAAGTCTTGGCCAGCTCTTG  |
|                  | exon 4                                       | AAGCCCTCTTGAACCTCT      | CCTGGCCAGTGAATGTAAGA   |
|                  | exon 5                                       | TTGAGGAAGGGTTCCAAGAC    | CAGCGAATTAACAAGGGG     |
|                  | exons 6,7                                    | AAAAACAAGAGTGAAGCCGAT   | AGATTCAGGAGAGCTGGCT    |
|                  | exons 8,9                                    | GATTCACAACATGCAAGCCACA  | AAATAAGGCACTTGGCTCAGA  |
|                  | exon 10                                      | GAGAATCAACAAGGCAATG     | AAGGCACTGACCAATGCT     |
|                  | exons 11,12                                  | TGGCCCTTAGGTTCTTCAAT    | ATAGTCTGTGGCTGGTCTCT   |
|                  | exon 13                                      | ATGTCAAGCCACAAGGTGAA    | AGATGAAAGGTGGAGAGGCTC  |
| <i>SNRPB</i>     | exon 1                                       | AGCAGCTCTCAATGCGAATTT   | CGCCAAAGTCTGTCTT       |
|                  | exon 2                                       | GTGGCATGGGAAATTCCTA     | AGCGTCAATGTCCCAATTT    |
|                  | exon 3                                       | GGGCTATCTGGGAAAGTTTG    | CCTCTTGCAGGGTAACTCTT   |
|                  | exon 4                                       | AATGGTGTGGCAACATGGA     | CTTTTCACTGTCTTACGGGC   |
|                  | exons 5,6 ( <i>SNORD119</i> )                | TGGTCTGAGAGTGTAGCAT     | GCCCAAGAAATAGCTCAA     |
|                  | exon 7                                       | ACATAAGAAAGGATGACCT     | GGGAAAGAGTAAAGATCAGGG  |
| <i>ZNF343</i>    | exons 3,4                                    | GATGGAGATCCGTTGTTGTT    | TCAAAGAAAGCCTAATGCTTCA |
|                  | exon 5                                       | TGTCAAGGGCTAGAAATGTT    | TAGAAGTAAAGCCCAATGGAG  |
|                  | exon 6                                       | TTTGCAAGGGGAGAGATG      | TTATGGCTGCAACTCAATGG   |
|                  | exon 7-1                                     | GGCATGGCAGTAAAACATTC    | TCACAAGGCTTGTCCACA     |
|                  | exon 7-2                                     | GTGTGGCAAGCTTTAGAA      | TACACAGGGTCTACTCCCAT   |
| <i>TMC2</i>      | exons 1,2                                    | AAATCTCAACCAAGAAGCCCC   | TCCCATGTTAAACACTTGGC   |
|                  | exon 3                                       | TTTGGGGTGTCTGTCTGA      | TTCTGGGATGAAAGAACCCAC  |
|                  | exon 4                                       | TAGAATTTGGCTCCGCT       | AGTCTCCGAGTCTCCATG     |
|                  | exon 6                                       | TTCTGCCTACCATGCTGTTA    | AATTGGCAAGTACGATTTGG   |
|                  | exon 7                                       | CGTTGGGAAAGTAAAGGTTG    | TGGCTGACAAAGTCAAAAC    |
|                  | exon 8                                       | TTCACTTTCTGACTGTGGCA    | CAATTACTTTGACACCAAGCC  |
|                  | exon 10                                      | AGCTGAGACTGTCTATTGCA    | TGCAAGACATGGTTTGA      |
|                  | exon 11                                      | AGGAAGTGAAGGGAAGAAACA   | ATGGCTGGTCAATGTCTTT    |
|                  | exon 12                                      | TGTCTGGCTATCCTCAAAGC    | ACCAAGCAGAACATTTCTTA   |
|                  | exon 13                                      | ACCAAGTGTGACATGGTGA     | GTTGTAAAAGCCAGTCCCAA   |
|                  | exon 14                                      | CATGTTGATGCTTTGCCA      | AACAATGGTCACTTTGGTTC   |
|                  | exon 15                                      | TGAAAGCCTGAGAAAGGAAAT   | CAAGAGATTTGAGTTCCCA    |
|                  | exon 16                                      | TGCCTCTCTTCAACACAAA     | AGGAGCTCAGCAACTTGT     |
|                  | exon 17                                      | TGCAAGGCTGAAAGATAGA     | CAGAAACTGTCTGCTTCTCA   |
|                  | exon 18                                      | ATGGTCTGGCTGATGATCG     | ATTAAGTGGCAATGTGGTG    |
|                  | exon 20                                      | TCTGGTCTTCCAGGAAAGCA    | CCATGCAATTTCTTTCCCT    |
|                  | exon 21                                      | CAGGACCTTCTCCACATGGA    | TGCATGCTGTGATCTTCA     |
|                  | exon 22                                      | AAATCGCTTGAAGCCAGGA     | ATTCACCTGCCAACTTCAT    |
|                  | exon 23                                      | AGTGAATCCGACAGCTCTCA    | TCAAGCGATCCACCCACTT    |
| <i>NOP56</i>     | exons 1,2 ( <i>MIR1292</i> )                 | TTCCCAAGTCTTTGCC        | ATCTAGAGCTTTCCAAGCCC   |
|                  | exons 3,4                                    | TGAAGGAAGTGGAGGATCA     | CCTTAGGCTCTGTGAAGACAA  |
|                  | exons 6,7                                    | TGATGGGAGGGATCTAGGTA    | AACACAGCTCTGGTAAAGCA   |
|                  | exon 9-1                                     | TGGATCTTTGCCAATTTCC     | TGGTCAAGCATCAGGTGA     |
|                  | exon 9-2 ( <i>SNORD86</i> , <i>SNORD56</i> ) | ATGCTGGCAGCCTCAACAA     | CAGACAGTCACTCACTCCA    |
|                  | exon 9-3 ( <i>SNORD57</i> )                  | GGAGAGCTTCGAGAAACAAGT   | AAAACAACCCCACTGCTG     |
|                  | exon 9-4                                     | TGGCTGAGGTAATTTCTCAT    | ACTGAGGCTGTCAATGCTGC   |
| <i>SNORD110</i>  | exon 1                                       | TCTGCTTTCTGTTCGATGG     | TCAGGGGAAAGACACAGTTC   |
| <i>SNORA51</i>   | exon 1                                       | CCACCCATAACTGGAGCCT     | TGCAAGAGCCACAGTCACT    |
| <i>IDH3B</i>     | exons 1,2                                    | AAAAGGAGAAACAGGGCTGA    | ACCGATCTGGGATGAGAA     |
|                  | exons 3,4                                    | AATCTGGCTGGGCTCTCTCT    | TGGTTCCTGGAGTAAATA     |
|                  | exons 5,6                                    | TTACTGATGGGGAATGGGA     | TCACAAGCAGTCAAACTGGT   |
|                  | exons 7,8,9                                  | CCCCAAATCAAAATTTGAGAC   | AGATGAAAGAACGCCCTGAGA  |
|                  | exon 12                                      | ATCTGGCTCTCTTCCATT      | AAAGGCGGTTGGCAAGA      |
| <i>EBF4</i>      | exon 1,2                                     | GGAAATCGGGAGTACAGTCA    | TCAGAAATCTACCGGGGCA    |
|                  | exon 3                                       | TCCAACATTCAGGCTATCA     | TTGATGTTTCAAGGGAGTCA   |
|                  | exon 4                                       | TTTTTGGCCAAACTCTTGGC    | GGACAAGATGGGAGGATGCT   |
|                  | exon 5,6                                     | AAGTGGGGTATGAGGAAAGGG   | TAGACAAGAGGGCAAAAGCCA  |
|                  | exon 7                                       | TAGGCTTGGAGATGCCA       | TAAACAAGCCAGGCTAATGG   |
|                  | exon 8                                       | ACATCAGCACCTCAGCTCA     | TCCAGAAAGTGGCCACT      |
|                  | exon 9                                       | CCATGATGGGATATGGGAT     | ACAAGTGGAGAAAGGAGTGGC  |
|                  | exon 10,11,12                                | TTTTTTGACGCGCTGGGA      | AAATGTTCAAGGTTGAGATGG  |
|                  | exon 13,14                                   | GAGTTTTCGGGGGACTTG      | TGCTGAAAGGCTGTGATGC    |
|                  | exon 15,16                                   | AGFAACCAAGTATGGCGCTC    | CGGCAAGAAAGGCTAAAAGT   |
|                  | exon 17                                      | AACAAAGTACCCCAAGGTGCA   | AAGAGCAGGTTAGCCAGCAT   |
|                  | exon 18                                      | AAAGTCTATATCCCTGCC      | AGGCTGAGCAGGATGAA      |
| <i>CPXM1</i>     | exon 1                                       | TCTGTGTGGTCACTTATG      | TGTGTGATGTGTGAGTGC     |
|                  | exon 2                                       | TGCTGTGGCTCACATGTC      | TAAAGTGTCTCTCGCTA      |
|                  | exon 3                                       | AACTTAAAGCTCACTTCCCA    | GACACAGGCACTGGTGTCA    |
|                  | exon 4,5                                     | ATGGTCTCAGGGTGGGAAGG    | AAAGGCAAGAGTGTGTTGGA   |
|                  | exon 6                                       | TCTAGCTGAGCCCACTAGGGT   | AAAGGGTGTTCACAGTGA     |
|                  | exon 7                                       | AGTCAAGCCAGGGTGGT       | TGCACTCTGGTGTGTTCA     |
|                  | exon 8,9                                     | ACTCTGTCTTCTCGCTGTG     | GAACAGACCCAGCACTGTA    |
|                  | exon 10                                      | TGAAGTGTCCCTCAGAGAAAG   | CCTGTGTCTTCCAGAGCAAT   |
|                  | exon 11,12                                   | TTCAATGTTCCATGGAGCTCA   | TGGTACTGTAGCAGAGCTG    |
| <i>C20orf141</i> | exon 1                                       | CACCAAGCTGCTATGAGTCA    | TGCTGCCACTTACCTATGGA   |
|                  | exon 2                                       | TGGCAGGTGGCATTGTA       | TTGGCTCCCTGGTATGAT     |
| <i>FAM113A</i>   | exon 2                                       | TCACTCTCTCTTATGCAAT     | ACTGGACGGAACAGACCAAA   |
|                  | exon 3                                       | TCTGTCCGTCAGAGGTTT      | TTGACAGGCACTATCTGT     |
|                  | exon 4-1                                     | ATCAACTCTGCTCTGGGAT     | TTTTCACTCTCACACCCAT    |
|                  | exon 4-2                                     | CGGAGCAATATCTTGTCCA     | TCAAAGGCTAAAGCCATCA    |
|                  | exon 4-3                                     | TGTAACAATTTGATGCGGGA    | TTGTTTAAAGTAGGCTTGGGA  |
|                  | exon 4-4                                     | AAAGGACACACTTTGGGCTTG   | TCCAGGTGAGCTTCTGTGTT   |
|                  | exon 4-5                                     | TCTTGTGCCCTAGCACT       | GGAGGCAACTTCAATGATT    |
| <i>VPS16</i>     | exon 1                                       | AAGTGAAGCTGCCACAGT      | TGTGGCTAAGTGGCAGA      |
|                  | exon 2,3,4                                   | AGCCTTGGGAGACAAATGGA    | CGGACCAAACTCAAGTGA     |
|                  | exon 5,6,7,8                                 | GACACTTCAACATGGCAATGTA  | CGAATCAAGGAAGTGTGTC    |
|                  | exon 9,10,11                                 | GCTGTCCGAGACAAAGGATTA   | TGGAAGCAGTAGTGTCTTCA   |
|                  | exon 12                                      | TGGGTTACTATTGGGAGGATCT  | TGGAAGTAAAGCCCGCTT     |
|                  | exon 13,14                                   | TATAGCCAGTATCCCTGTGACG  | TGTTGGGTTACAGGCAATGA   |
|                  | exon 15,16,17,18                             | TAAAGGCTTGCAGGAGTGA     | AAACAGGAGGCTGATTCCT    |
|                  | exon 19,20,21                                | ATCCCTTCAAGGACATCAGATGG | AGCTGACAGGAGCATGAA     |
|                  | exon 22,23                                   | GGGGTGGGGATATATGTAAT    | GGAAACAAGGAGTTTGTGT    |

|                  |                         |                         |                         |                       |
|------------------|-------------------------|-------------------------|-------------------------|-----------------------|
| <i>PTPRA</i>     | exons 1,2,3,4           | ATCCAGATGTTTGTGACACCC   | ACAGTGGAGCAGATGGAGT     |                       |
|                  | exons 5,6,7             | AGCCATCCCTCTAGGACATCA   | TGCGTCCCAACAAATGTGTAT   |                       |
|                  | exons 8,9               | TGGTTTAGGTGATTTCTGCC    | GCTTCTCTGGTAACTGTGGGA   |                       |
|                  | exon 12                 | TGCGTGGCTACTTTTGTGGA    | ATGCCACCAATCTGGCTAAT    |                       |
|                  | exon 15                 | TGAGGAGCATGCATATCAGG    | CAATGCTGACATCAATCC      |                       |
|                  | exon 16                 | TGTTGAGGGGATTTGGTCT     | CTTCACTATGCTAACCCAAA    |                       |
|                  | exon 17                 | CCAGACCACTGTCCAAAGTIT   | AGGGGAAAAACAACACAAAGA   |                       |
|                  | exon 20-1               | CACCTCAATAAGCCCTGGCAT   | TGGGCTTGGACAGATGGAA     |                       |
|                  | exon 20-2               | TTCCAAGTGTCCAAAGGTA     | TGGAAGCTAAAACGGGGTCTA   |                       |
|                  | exon 21                 | TCTTACAGGCTTGGTCCATGA   | GGTGAAGCAAACTCACTTCA    |                       |
|                  | exon 24                 | TAAAGGAGCTTGTGGCTGTTT   | ACCTTGGCTTCCAAAGTCT     |                       |
|                  | exon 25                 | TGGCATCTTTATACAAAGGTG   | ACATGGGAAACCAATGGGAA    |                       |
|                  | exon 27                 | CCTGGCTGGATTTCTTATT     | CAAGGACAGAGGGGCTTATTA   |                       |
|                  | exon 28                 | CCTGGCACATACATGGTAA     | TCTAGGCACACACTGAGGTT    |                       |
|                  | exon 29                 | AAAGAGTCAAAGGGCTTCT     | TTTCCACAGTCTTGGTCA      |                       |
|                  | exon 30                 | TTTTAGTTCTGACCTGCCA     | TAATCTTGGAGGACTGCCCTA   |                       |
| exon 31          | TTCTAGCTGGAGGTCAAGATT   | TTGGGGCTAGGGTACAGATT    |                         |                       |
| exon 32          | TGCAATTCAGTCCACTTCA     | AGTGTTCACAGTGCAGGAT     |                         |                       |
| exons 33,34      | CCAAGTGAACATATGGGAA     | AGTGGTGGTGAATCAAT       |                         |                       |
| exon 35          | CAGAAAGCAACCAAGTGTCA    | TTGGGAAAGCTAATGACTGC    |                         |                       |
| exons 36,37      | ACGAAAGCTATCAGCGTAA     | TAGCAATCCAACTCTGTCTGG   |                         |                       |
| exon 38          | TGAGTCCCTCCACAGCAT      | TATGCTCCCAATGCTGCCAT    |                         |                       |
| exon 39          | CAGAGCTCAGGTGAAAGTCA    | TTTCTCGGCTGAGGATTTCA    |                         |                       |
| <i>GNRH2</i>     | exon 2,3                | GCAGAGAGGGAAAGGGATA     | TGAGAAATGGCTGGGGT       |                       |
|                  | exon 4                  | TAGCTGGATCCCTCAAGCTT    | GGGGCAATCCCTTATGTTACT   |                       |
| <i>MRPS26</i>    | exon 1                  | TTCCGTTCCAGAGGCCACA     | TTCTCTGCACTCGGACA       |                       |
|                  | exon 2,3                | TTACAGCACTACCCGCCAGA    | TTTGGCTGACTGGCACT       |                       |
|                  | exon 4                  | AGAGCAAGGACTGCTTTCTCA   | TGCGTTTGGAAAGTTCTGAC    |                       |
| <i>OXT</i>       | exon 1                  | AATGAAAGAGGAAAGCCCGTA   | TCAAAAATCCGCTCAGCTCT    |                       |
|                  | exon 2,3                | GGAGCTGAGCGGATTTTGA     | AGAAACAGCAACCCGCTCTGT   |                       |
| <i>AVP</i>       | exon 1                  | TGTCCTCCAGATGCTGAAT     | ATGCCATGCTCCCTCT        |                       |
|                  | exon 2,3                | AAACCAAGTGCAGGAGAT      | TCCCACTCTCTCCCTTTC      |                       |
| <i>UBOX5</i>     | exon 4                  | AAGGAAAGTCAAGTGTGGACG   | TGATTTAGAGGTGAGCCTGC    |                       |
|                  | exon 5-1                | CCTGATCTGGGACAATTCAAGT  | TGCGGTTACACTTCTCCAAGT   |                       |
|                  | exon 5-2                | AGAAGCTGCCGAGATCAATT    | TCTGAAAGCAAAAGCTGAGGGG  |                       |
|                  | exon 6                  | TACTCCCGGTGTTCTGTGAT    | AGGGTGGGTGTGGAACTGA     |                       |
|                  | exon 7                  | CCACTCCCTACCTGATCAGA    | AGCCGAAAGCAATGTGCTAT    |                       |
| <i>FASTKD5</i>   | exon 2-1                | TCATTTGTGATCCCTGGCTC    | ATGCTGCTTCCAGGCAAA      |                       |
|                  | exon 2-2                | CCGTGTTCAAGCTATAATGC    | ATGTGATCCACGTGAGTAA     |                       |
|                  | exon 2-3                | AGGTGGTACCACTCTGTTGG    | ATACCAAGCAATTCAGACCC    |                       |
|                  | exon 2-4                | AGGGTTGTGCAAGTATGCTCA   | AACTCTACCAACGGTACCA     |                       |
|                  | exon 2-5                | TAGCAGATAAATCAAGGGCCA   | TAGCTCTAACTGCTTGGAT     |                       |
| <i>ProSAPI1</i>  | exon 1                  | ATTCTTCACTTGGATGGCT     | CACAAACCAACCTCCAAGAA    |                       |
|                  | exon 2-1                | GGGAACCTCAAGGTGAAAT     | AGCTCTGGATGAGTCACTG     |                       |
|                  | exon 2-2                | TCCAGCAAGAGTGGGTGCT     | ATTGATTTTGTCCCTCCG      |                       |
|                  | exon 3                  | TTGAGTCCAGGCAAGGAAAT    | AGGGAGAACTGTGTCACA      |                       |
| <i>DDRKG1</i>    | exon 1                  | GGACATACCGTCTGATAAATTC  | TTGGAGTCGAGAGAAAGGGGA   |                       |
|                  | exon 2                  | CCTTGCCAGTCAAGCTGAGA    | AACAAATGCCAGTCCCAA      |                       |
|                  | exons 3,4               | AGTGAATTTGCAAGTGGGT     | AGGGGACCAAAATAACCAAGG   |                       |
|                  | exons 5,6               | TTGGGGGAATGGAAGAAATG    | GGGTGGAGGGGAGAGAACT     |                       |
|                  | exons 7,8               | TACAGTGTGTTTCCAGCCACC   | TCCTCTTGTAACTGCAATCCA   |                       |
|                  | exon 9                  | TGATTCGACTTCTCAAGAGG    | TTATCTAGGTCTTGGGGCA     |                       |
|                  | <i>ITPA</i>             | exon 1                  | AGAGAAAGCGGAAAGCAAGG    | TTCTTGGCCCAAGCTTTT    |
|                  |                         | exon 2,3                | GTAAGCTTTTGAAGATGGGCA   | CGGTCTAGAAAAGTCAACAA  |
|                  |                         | exon 4                  | CCAAAGTTAAGAGATTGGCCG   | AAAGAAAGGCAATGCTTCTCC |
| exon 5           |                         | TGCTGGGATTATAAGCGGGA    | TACAGGGTACGAGCTGCAAGT   |                       |
| exon 6           |                         | CCGCTAACCCAAATTGAGA     | TGAAAAGCTGGAAAAGGCTGA   |                       |
| exon 7           |                         | AGCAAAACATTTGCAAGTCT    | AGATTCTAGTGTCCACCCCA    |                       |
| exon 8           |                         | ACTCCCTTCTCTGGGGT       | TCCACTTCCAGAGTTTCTCA    |                       |
| <i>SLC4A11</i>   |                         | exon 1                  | AGTCGACGTTTCCAGAAAG     | CAGAGCCCTAATGAAACCA   |
|                  | exon 2,3                | TTTTGGACCAACGGCTCTG     | AGATAGCGGAGCAAAAGCCA    |                       |
|                  | exon 4,5                | TTCTCCGCTATGGGATG       | TCTTGGAGGCAATGGGAGA     |                       |
|                  | exon 6,7                | TGATGGCTTCCCTGAGAAAT    | TCTTCTCCCAAGTTGGTGG     |                       |
|                  | exon 8                  | TTTTCCCTCCCTAGCAGAGG    | CAACATGTTTCTGACACCCCA   |                       |
|                  | exon 9,10,11            | AAAACCTGCTGCCAGTTCATG   | AATGGTGGCCAGAGAAAG      |                       |
|                  | exon 12                 | ATCGCTTTCGGGTCTCTCAA    | TTGGGGCAGCAATATGGT      |                       |
|                  | exon 13                 | ACCATAATGCTGCCCAA       | TTGATCAAGGGCACACACT     |                       |
|                  | exon 14,15,16           | TTGATCAAGGGCACACACT     | TTCAACAGCTGACGAGCA      |                       |
|                  | exon 17,18              | TTGGTGAATGCAAGGGAGAA    | ACCTTCCGGATGATGTTGT     |                       |
|                  | exon 19,20              | CTCTATGGCTCTTCTCTACAT   | AGTCAACCCACACCTACACCT   |                       |
| <i>C20orf194</i> | exon 2                  | TTAAGAAAGTGGGGTCCCTGT   | TGAGCCGTTCAGCAAGAA      |                       |
|                  | exon 3                  | ATCCCAAGCAAGTCAATCCT    | ACAATTTGGGGGAAACAAG     |                       |
|                  | exon 4                  | GTTCTGGCAAAAAGTGGT      | ACTGGGGCTTTGGACTATTT    |                       |
|                  | exon 5                  | TTTGGTTTACAAGGCAAGTGT   | TCCTTTTGTCTCCAGGGCATA   |                       |
|                  | exon 6                  | CTTTGGAAACAAGTCCCTGGGT  | TTGCAAGAAAAGTCCCAT      |                       |
|                  | exon 7                  | TTTTGCTAGTGGAGCCCT      | TAACCTGCTCCATGCCCTGT    |                       |
|                  | exon 9                  | TCTGTATGTGATGTGTGTATGT  | TGACCGGAGCAAACTAAATATCC |                       |
|                  | exon 10                 | GAGATTCATCCATGAGGATGCA  | GGGGGAACTACTTTATGGTAT   |                       |
|                  | exon 11                 | CACCTCTCTGAGCATGTGTGTGA | GCAGAGAAACAGACATTTACAG  |                       |
|                  | exon 12                 | CTAGCTTGAAGTTAGTATGTCCC | GGGTTAAATCAACACTAACTGG  |                       |
|                  | exon 13                 | CCATCTCATGACAGAGTAAAGAC | ATCCAGAAATATCAAGAGGGAG  |                       |
|                  | exon 14                 | TGGGGCAGAAAGCTAAACTG    | TTATGTTGCCAGGCTGGT      |                       |
|                  | exon 15                 | GCCCAAGCATGTGACTTTT     | TGGTGTCAAAGAGCCCAA      |                       |
|                  | exon 17                 | TCATGCCTCAAGTATGACAT    | TTTGGCTTCTAAGTGAAGGCTG  |                       |
|                  | exon 18,19              | AAGGATGACACACCTCACTGT   | TGGGATGAGCTGAGAGATCA    |                       |
|                  | exon 20                 | AAAGTCACTCCAGTCAAGAA    | AGTGCAGTCTGTGATCATCA    |                       |
|                  | exon 21                 | AGCTCCTGAGAAAGGCAATTT   | AACAGCTAGTCAAGGCTGACAT  |                       |
|                  | exon 22                 | ACATGGAATGCTGGAGAGGA    | AGGGGAGGAAATGCAAAATGAA  |                       |
|                  | exon 23                 | ATACATTTGGGCAATCTGAGCCT | TCACTCAAAAAGTGGGTGGT    |                       |
|                  | exon 24                 | CACAGGCTTCAAGTCAAAATC   | TGTGCTGGTCTGACACTG      |                       |
| exon 25          | AGCACATCTAATCTGAACACAG  | ATTAGAAAGCAATGCAACCCCA  |                         |                       |
| exon 26          | TCAAGCCTCTATTTTGAAGCA   | GCAAGTGGCAAGATGAA       |                         |                       |
| exon 27,28       | GTGTTTGGAAAGTGTGACTCTG  | AAGGAAAGTGGAGTCTGTAA    |                         |                       |
| exon 29          | TGGCTAAAGTCAAGAGTATGT   | TACAGGAAGTGTCAAGAGGACT  |                         |                       |
| exon 30          | CCAAGATGGCTTCTCTGAAATG  | CTGCTCATGATGATGACTGT    |                         |                       |
| exon 31          | AGATTGGGGCTCTTCTTTT     | TCCAAAGGGGTCTATGAGGA    |                         |                       |
| exon 32          | CATGGCTATCCTATGTGCTCAGT | GCTCTTGGAAAGAAATGTCCTA  |                         |                       |
| exon 33          | TATTGGGTGTAAAGGTGTGTCT  | TGGCTCAAAAAGTCACTTCTCC  |                         |                       |
| exon 34          | ATTACCTGGGTATGATGGCACA  | TTGCTGCTACAGGATGATT     |                         |                       |
| exon 35,36       | GAGGGGTTCACCTTGTGTAG    | TTTCTGAGATCTGAGCAGCAT   |                         |                       |
| exon 37          | ACCTACTCCTCCTTCTAAGCTG  | TCTCTCAAAGTGTCCCTGCAA   |                         |                       |
| exon 38          | TTATATCCAGGCCATAAGGCA   | AATCTGTACGCACTTCCCT     |                         |                       |
| exon 39          | AGGCAAGGCTTGAAGTGT      | TTTGGCTGTGCAATCCT       |                         |                       |
| exon 40          | ACAAGAGTCCATCAGGTCCCT   | ACAACATGCACTCAAGCCA     |                         |                       |

**Table S2. Variants Identified by Candidate Gene Sequencing**

| Gene                            | Position (NCBI 37.1) |         | region       | position        |                 | rs         | SNPs         | Wild-type          | Ped1_IV-4                 | Ped3_III-1                | Ped2_II-1                 | Ped4_II-1                 | Ped5_II-1                 |
|---------------------------------|----------------------|---------|--------------|-----------------|-----------------|------------|--------------|--------------------|---------------------------|---------------------------|---------------------------|---------------------------|---------------------------|
|                                 | Start                | End     |              | NT_011387.8     | Chr (V37.1)     |            |              |                    |                           |                           |                           |                           |                           |
| <i>PDYN</i><br>NM_024111.2      | 1959402              | 1974702 |              |                 |                 |            |              |                    | No variation              |
| <i>STK5</i><br>NM_080836.3      | 2082528              | 2129201 | exon 1       | 2022732         | 2082732         | rs6112857  | Arg69Gly     | CC                 | GG                        | GC                        |                           |                           |                           |
|                                 |                      |         |              | 2022767         | 2082767         | rs6106228  | Gln80Gln     | GG                 | AG                        | AA                        |                           |                           |                           |
|                                 |                      |         |              | 2037688         | 2097688         | rs1891227  | Ala423Ala    | TT                 | CT                        | CC                        |                           |                           |                           |
| <i>TGM3</i><br>NM_003245.3      | 2276613              | 2321725 | intron 12    | 2255929         | 2315929         | rs2076406  |              | GG                 | AA                        | AA                        |                           |                           |                           |
|                                 |                      |         | exon 7       | 2237790         | 2297790         | rs214814   | Ser249Asn    | GG                 | GG                        | GA                        |                           |                           |                           |
| <i>TGM6</i><br>NM_198994.2      | 2361554              | 2413399 | 5' near gene | 2301505         | 2361505         | rs9680025  | 5' near gene | AA                 | AG                        | GG                        | AG                        | AG                        | GG                        |
|                                 |                      |         | intron 1     | 2301684         | 2361684         | rs2422753  | IVS1+63      | CC                 | CT                        | CC                        | CT                        | CC                        | CC                        |
|                                 |                      |         | exon 2       | 2315262         | 2375262         | rs2076405  | M58V         | TT                 | TC                        | CC                        | CC                        | TC                        | CC                        |
|                                 |                      |         | intron 2     | 2315440         | 2375440         | rs7266902  | IVS2+169     | GG                 | GT                        | TT                        | GT                        | GT                        | TT                        |
|                                 |                      |         | exon 6       | 2320323         | 2380323         | rs6114033  | Lys263Lys    | GG                 | GG                        | GA                        | GA                        | GG                        | GG                        |
|                                 |                      |         | intron 6     | 2320396         | 2380396         | rs2076404  | IVS6+12      | CC                 | TT                        | CT                        | CT                        | CT                        | CT                        |
|                                 |                      |         |              | 2320628         | 2380628         | -          | IVS6+242     | CC                 | CC                        | CC                        | CC                        | CC                        | CC                        |
|                                 |                      |         |              | 2320629         | 2380629         | -          | IVS6+243     | GG                 | GA                        | GG                        | GG                        | GG                        | GG                        |
|                                 |                      |         | intron 8     | 2324151         | 2384151         | rs6137891  | IVS8+5       | GG                 | GA                        | GA                        | GA                        | GA                        | GA                        |
|                                 |                      |         |              | 2338017         | 2398017         | rs2295077  | Lys492Lys    | CC                 | CT                        | CT                        | CT                        | TT                        | CT                        |
|                                 |                      |         | intron 2     | 2351368         | 2411368         | rs2076648  | IVS12+121    | CC                 | CC                        | CC                        | CC                        | CC                        | CC                        |
|                                 |                      |         |              | 2351737         | 2411737         | rs11470465 | IVS12+64     | GA/GA              | -GA                       | -GA                       | -GA                       | -GA                       | GA/GA                     |
|                                 |                      |         |              | 2353125         | 2413125         | rs2076653  | IVS12-11     | GG                 | GA                        | GA                        | GA                        | GA                        | GG                        |
|                                 |                      |         |              | 2353126         | 2413126         | rs6036467  | IVS12-10     | CC                 | TT                        | TT                        | TT                        | TT                        | TT                        |
|                                 |                      |         |              | 2353320         | 2413320         | rs2076652  | 3'-UTR       | AA                 | AG                        | AG                        | AG                        | AG                        | GG                        |
| exon 13                         | 2353472              | 2413472 | rs45610835   | 3'-UTR          | TT              | TT         | TT           | TT                 | TT                        | TG                        |                           |                           |                           |
| <i>SNRPB</i><br>NM_003091.3     | 2442281              | 2451499 | 5' near gene | 2391504         | 2451504         | rs6049290  | 5' near gene | CC                 | CC                        | TC                        |                           |                           |                           |
|                                 |                      |         | 5' near gene | 2391503         | 2451503         | rs4815262  | 5' near gene | AA                 | AA                        | GA                        |                           |                           |                           |
|                                 |                      |         | exon 1       | 2391451         | 2451451         | rs6049288  | 5'-UTR       | GG                 | GG                        | TG                        |                           |                           |                           |
|                                 |                      |         | intron 3     | 2384665         | 2444665         | rs73606142 | IVS3-120     | TT                 | CT                        | TT                        |                           |                           |                           |
| <i>SNORD119</i><br>NR_003684.1  | 2443598              | 2443693 |              |                 |                 |            |              | No variation       | No variation              |                           |                           |                           |                           |
| <i>ZNF343</i><br>NM_024325.4    | 2462463              | 2489778 | intron 3     | 2414176         | 2474176         | -          | IVS3-11      | TT                 | TT                        | TC                        |                           |                           |                           |
|                                 |                      |         | intron 4     | 2413587         | 2473587         | rs41308639 | IVS4-22      | AA                 | AT                        | AT                        |                           |                           |                           |
|                                 |                      |         | exon 7       | 2403921         | 2463912         | -          | Leu65Leu     | TT                 | TT                        | TA                        |                           |                           |                           |
| <i>ZMC2</i><br>NM_080751.2      | 2517253              | 2622430 | exon 3       | 2539387         | 2479387         | rs6050063  | Arg123Lys    | AA                 | AG                        | AG                        |                           |                           |                           |
|                                 |                      |         | intron 3     | 2539568         | 2479568         | rs4815320  | IVS3+148     | TT                 | TA                        | TA                        |                           |                           |                           |
|                                 |                      |         | intron 4     | 2542669         | 2482669         | rs7270277  | IVS4+13      | CC                 | CT                        | CC                        |                           |                           |                           |
|                                 |                      |         |              | 2542747         | 2482747         | rs4815323  | IVS4+91      | GG                 | GT                        | GG                        |                           |                           |                           |
|                                 |                      |         | intron 6     | 2552926         | 2492926         | rs1883980  | IVS6+11      | AA                 | AG                        | GG                        |                           |                           |                           |
|                                 |                      |         |              | 2559778         | 2499778         | rs6083735  | IVS6-14      | GG                 | GC                        | CC                        |                           |                           |                           |
|                                 |                      |         | intron 9     | 2572816         | 2512816         | rs6050433  | IVS9-139     | TT                 | TG                        | GG                        |                           |                           |                           |
|                                 |                      |         | intron 13    | 2591005         | 2531009         | rs1883978  | IVS13-59     | TT                 | GG                        | GG                        |                           |                           |                           |
|                                 |                      |         | exon 14      | 2591232         | 2531232         | rs6050576  | Asp527Asp    | CC                 | TT                        | TT                        |                           |                           |                           |
|                                 |                      |         | intron 15    | 2593006         | 2533006         | rs1015159  | IVS15+20     | AA                 | AG                        | GG                        |                           |                           |                           |
|                                 |                      |         | exon 16      | 2593863         | 2533869         | rs6515646  | Ser589Ser    | TT                 | TC                        | TC                        |                           |                           |                           |
|                                 |                      |         |              | 2594254         | 2534254         | rs6115181  | non-coding   | AA                 | AG                        | AG                        |                           |                           |                           |
|                                 |                      |         | intron 16    | 2596762         | 2536762         | rs6050622  | IVS16-21     | GG                 | GA                        | GA                        |                           |                           |                           |
|                                 |                      |         | intron 17    | 2596969         | 2536969         | rs4621228  | IVS17+118    | TT                 | TT                        | TA                        |                           |                           |                           |
|                                 |                      |         | exon 18      | 2597978         | 2537978         | rs4815428  | non-coding   | GG                 | GG                        | GA                        |                           |                           |                           |
|                                 |                      |         |              | 2598019         | 2538019         | rs6083566  | non-coding   | CC                 | CC                        | CT                        |                           |                           |                           |
|                                 |                      |         |              | 2598405         | 2538405         | rs13040075 | non-coding   | GG                 | GA                        | GA                        |                           |                           |                           |
|                                 |                      |         | intron 20    | 2616556         | 2556556         | rs910271   | IVS20-26     | TT                 | TC                        | CC                        |                           |                           |                           |
|                                 |                      |         | intron 21    | 2616679         | 2556679         | rs2422808  | IVS21+29     | CC                 | CG                        | GG                        |                           |                           |                           |
|                                 |                      |         |              | 2616776         | 2556776         | rs13038659 | IVS21+126    | TT                 | TG                        | TG                        |                           |                           |                           |
|                                 |                      |         | exon 22      | 2618094         | 2558094         | rs6037181  | IVS21-26     | GG                 | GG                        | AA                        |                           |                           |                           |
|                                 |                      |         |              | 2618140         | 2558140         | rs6083915  | Ser802Ser    | TT                 | TT                        | CC                        |                           |                           |                           |
|                                 |                      |         | intron 22    | 2618308         | 2558308         | rs6050771  | IVS22+71     | CC                 | CC                        | TT                        |                           |                           |                           |
| exon 23                         | 2561998              | 2621998 | rs6050798    | 3'-UTR          | TT              | TT         | CT           |                    |                           |                           |                           |                           |                           |
| <i>NOP56</i><br>NM_006392.2     | 2633254              | 2639039 | exon 1       | 2573296         | 2633296         | rs6138678  | 5'-UTR       | GG                 | GG                        | CG                        | GG                        | GG                        | GG                        |
|                                 |                      |         | intron 1     | 2573397         | 2633397         | rs68063608 | IVS1-25      | g.263397_263403[S] | g.263397_263403[G]+(2300) | g.263397_263403[R]+(2200) | g.263397_263403[G]+(2200) | g.263397_263403[G]+(2000) | g.263397_263403[R]+(1700) |
|                                 |                      |         | exon 9       | 2577071         | 2637071         | rs8958     | Thr345Thr    | TT                 | CT                        | TT                        | CT                        | CT                        | TT                        |
| <i>MIR1292</i><br>NR_031699.1   | 2633423              | 2633488 |              |                 |                 |            |              | No variation       | No variation              | No variation              | No variation              | No variation              |                           |
| <i>SNORD110</i><br>NR_003078.1  | 2634858              | 2634932 |              |                 |                 |            |              | No variation       | No variation              |                           |                           |                           |                           |
| <i>SNORA51</i><br>NR_002981.1   | 2635713              | 2635844 |              |                 |                 |            |              | No variation       | No variation              |                           |                           |                           |                           |
| <i>SNORD86</i><br>NR_004399.1   | 2636743              | 2636828 |              |                 |                 |            |              | No variation       | No variation              |                           |                           |                           |                           |
| <i>SNORD56</i><br>NR_002739.1   | 2637270              | 2637340 |              |                 |                 |            |              | No variation       | No variation              |                           |                           |                           |                           |
| <i>SNORD57</i><br>NR_002738.1   | 2637585              | 2637656 |              |                 |                 |            |              | No variation       | No variation              |                           |                           |                           |                           |
| <i>IDH3B</i><br>NM_174856.1     | 2639041              | 2644843 | intron 2     | 2584407         | 2644407         | rs2073193  | IVS2-3       | GG                 | CC                        | CC                        |                           |                           |                           |
| <i>EBF4</i><br>NM001110514.1    | 2673524              | 2740754 | intron 1     | 2614174         | 2674174         | rs55820831 | IVS1-133     | AA                 | AG                        | AG                        |                           |                           |                           |
|                                 |                      |         | intron 2     | 2617329         | 2677329         | rs874688   | IVS2-11      | TT                 | TC                        | CC                        |                           |                           |                           |
|                                 |                      |         | exon 3       | 2617566         | 2677566         | rs2325900  | non-coding   | TT                 | TT                        | TC                        |                           |                           |                           |
|                                 |                      |         | intron 3     | 2618202;2618203 | 2678202;2678203 | rs11474226 | IVS3+58      | -/-                | -AAAG                     | AAAGAAAG                  |                           |                           |                           |
|                                 |                      |         | intron 12    | 2670870         | 2730870         | rs6138883  | IVS12+236    | CC                 | GC                        | CC                        |                           |                           |                           |
|                                 |                      |         | intron 15    | 2672934         | 2732934         | rs60014511 | IVS15+49     | GG                 | AG                        | GG                        |                           |                           |                           |
|                                 |                      |         | exon 17      | 2676104         | 2736104         | rs13042767 | non-coding   | GG                 | CG                        | GG                        |                           |                           |                           |
| <i>CPXM1</i><br>NM_019609.4     | 2774715              | 2781292 | intron 6     | 2717828         | 2777828         | rs742707   | IVS6+10      | GG                 | AG                        | GG                        |                           |                           |                           |
| <i>C20orf141</i><br>NM_080739.2 | 2795657              | 2735657 | exon 1       | 2736007         | 2796007         | rs12625619 | Leu59Leu     | GG                 | AG                        | AA                        |                           |                           |                           |
| <i>FAM113A</i><br>NM_022760.3   | 2815971              | 2821332 | exon 4       | 2758801         | 2818801         | rs751899   | non-coding   | TT                 | TC                        | CC                        |                           |                           |                           |
|                                 |                      |         |              | 2758480         | 2818480         | rs2325970  | non-coding   | AA                 | AG                        | GG                        |                           |                           |                           |
|                                 |                      |         |              | 2757100         | 2817100         | rs78139021 | non-coding   | TT                 | TG                        | TT                        |                           |                           |                           |
|                                 |                      |         |              | 2756821         | 2816821         | rs2274669  | Pro372Pro    | CC                 | CT                        | CT                        |                           |                           |                           |

|                             |         |         |              |          |          |             |              |              |              |        |
|-----------------------------|---------|---------|--------------|----------|----------|-------------|--------------|--------------|--------------|--------|
| VPSI6<br>NM_022575.2        | 2821373 | 2847378 | exon 3       | 2780773  | 2840773  | rs3818605   | Ser72Ser     | CC           | CT           | CT     |
|                             |         |         | intron 10    | 2782685  | 2842685  | rs6051449   | IVS10-15     | AA           | AC           | CC     |
|                             |         |         | intron 11    | 2783053  | 2843053  | rs632080    | IVS11-49     | AA           | AG           | GG     |
|                             |         |         | intron 16    | 2784983  | 2844983  | -           | IVS16-28     | AA           | AC           | AC     |
|                             |         |         | intron 17    | 2785130  | 2845130  | rs730819    | IVS17-22     | GG           | GA           | AA     |
| PTPRA<br>NM_002836.3        | 2844841 | 3019315 | intron 3     | 2785130  | 2845130  | rs730819    | IVS3+22      | GG           | AG           | AA     |
|                             |         |         | intron 26    | 2936423  | 2996423  | rs1178015   | IVS26-73     | TT           | AA           | AA     |
|                             |         |         | exon 27      | 2936497  | 2996497  | rs1178016   | Gly303Gly    | CC           | TT           | TT     |
|                             |         |         | intron 27    | 2936589  | 2996589  | rs1178017   | IVS27-58     | GG           | TT           | TT     |
|                             |         |         | intron 31    | 2942889  | 3002889  | rs544090    | IVS31+23     | TT           | GG           | GG     |
|                             |         |         |              | 2943027  | 3003027  | rs2277756   | IVS31+161    | TT           | CT           | CT     |
|                             |         |         | intron 37    | 2957674  | 3017674  | rs561843    | IVS31-126    | TT           | GG           | GG     |
| GNRH2<br>NM_001501.1        | 3024268 | 3026391 | exon 2       | 2965107  | 3025107  | rs6051545   | Ala16Val     | CC           | CT           | CT     |
|                             |         |         | intron 3     | 2966238  | 3026238  | rs6138994   | IVS3-94      | GG           | GT           | GT     |
|                             |         |         |              | 2966359- | 3026359- | rs71195814  | frameshift   | -/-          | -CCCCG       | -CCCCG |
|                             |         |         | exon 4       | 2966415  | 3026415  | rs8184100   | 3'-UTR       | CC           | CT           | CT     |
| MRPS26<br>NM_030811.3       | 3026675 | 3028896 | intron 2     | 2967220  | 3027220  | rs2277757   | IVS3-40      | GG           | GA           | GA     |
| OLT<br>NM_000915.2          | 3052266 | 3053162 |              |          |          |             |              | No variation | No variation |        |
| AVP<br>NM_000490.4          | 3063202 | 3065370 |              |          |          |             |              | No variation | No variation |        |
| UBOX5<br>NM_014948.2        | 3088219 | 3140540 | exon 7       | 3030848  | 3090848  | rs708973    | Arg510Arg    | TT           | TT           | TG     |
| FASTKD5<br>NM_021826.4      | 3127165 | 3140532 | exon 2       | 3068403  | 3128403  | rs3746698   | Gly438Gly    | AA           | AG           | AA     |
| ProSAP1P1<br>NM_014731.2    | 3143273 | 3149207 | exon 1       | 3087468  | 3147468  | rs17853865  | Asn114Asn    | GG           | GG           | GA     |
| DDRAG1<br>NM_023935.1       | 3171012 | 3185295 | intron 1     | 3087024  | 3147024  | rs7260750   | IVS1-13      | AA           | AA           | AG     |
|                             |         |         | intron 4     | 3124134  | 3184134  | rs2295553   | IVS1-73      | CC           | TC           | CC     |
|                             |         |         | intron 4     | 3116072  | 3176072  | rs7263489   | IVS4-73      | CC           | AC           | CC     |
|                             |         |         | intron 5     | 3115556  | 3175556  | rs2295549   | IVS5-42      | CC           | GC           | CC     |
|                             |         |         | intron 7     | 3112246  | 3172246  | rs2295547   | IVS7-16      | TT           | GT           | TT     |
| ITPA<br>NM_033453.2         | 3190056 | 3204506 | 5' near gene | 3130039  | 3190039  | rs45620433  | 5' near gene | CC           | CG           | CC     |
|                             |         |         | exon 3       | 3133978  | 3193978  | rs8362      | Gln46Gln     | GG           | GA           | GG     |
|                             |         |         | intron 5     | 3144176  | 3204176  | rs75609817  | IVS5-17      | GG           | GA           | AA     |
|                             |         |         | exon 8       | 3144084  | 3204084  | rs9101      | Gln87Glu     | GG           | GA           | GG     |
| SLCAA11<br>NM_001174089.1   | 3208063 | 3219887 | 5' near gene | 3159894  | 3219894  | rs6107260   | 5' near gene | TT           | TC           | CC     |
|                             |         |         | exon 1       | 3159698  | 3219698  | -           | 5'-UTR       | GG           | GG           | GC     |
|                             |         |         | exon 1       | 3159692  | 3219692  | rs6084314   | 5'-UTR       | GG           | GA           | AA     |
|                             |         |         | exon 2       | 3158634  | 3218634  | rs3810562   | Pro26Arg     | CC           | CG           | GG     |
|                             |         |         | exon 3       | 3158355  | 3218355  | rs3827076   | non-coding   | GG           | GC           | CC     |
|                             |         |         | intron 3     | 3155548  | 3215548  | rs3803957   | IVS3-8       | GG           | GT           | GT     |
|                             |         |         | intron 5     | 3155088  | 3215088  | rs6133022   | IVS5+126     | GG           | GA           | AA     |
|                             |         |         | exon 6       | 3154819  | 3214819  | rs3827075   | Arg145Arg    | AA           | AC           | CC     |
|                             |         |         | intron 8     | 3154126  | 3214126  | rs3803955   | IVS8+34      | GG           | GA           | GA     |
|                             |         |         | intron 10    | 3151719  | 3211719  | rs3803953   | IVS10-15     | AA           | AC           | AC     |
|                             |         |         | intron 17    | 3149371  | 3209371  | rs2281575   | IVS17-18     | CC           | CT           | CT     |
|                             |         |         | intron 17    | 3149357  | 3209357  | rs10048856  | IVS17-4      | GG           | GG           | GA     |
| C20orf194<br>NM_001009984.1 | 3229948 | 3388255 | exon 4       | 3302033  | 3362033  | rs6051818   | Val92Val     | AA           | AG           | AG     |
|                             |         |         | intron 4     | 3302009  | 3362009  | rs2008730   | IVS4+17      | AA           | AA           | AG     |
|                             |         |         | intron 6     | 3295567  | 3355567  | rs2208030   | IVS6+110     | AA           | AG           | AG     |
|                             |         |         | exon 11      | 3264373  | 3324373  | -           | Phe265Leu    | CC           | CT           | CC     |
|                             |         |         | exon 12      | 3261244  | 3321244  | rs80335486  | Thr296Thr    | TT           | CG           | CT     |
|                             |         |         | intron 19    | 3239054  | 3299054  | rs6139071   | IVS19-7      | AA           | AG           | AG     |
|                             |         |         | intron 22    | 3236279  | 3296279  | rs2236115   | IVS22+103    | GG           | AG           | AG     |
|                             |         |         | intron 23    | 3236428  | 3296428  | -           | IVS23-99     | -/-          | T/-          | T/-    |
|                             |         |         | exon 24      | 3225140  | 3285140  | rs2422864   | Arg577Gly    | TT           | CC           | CC     |
|                             |         |         | intron 25    | 3217602  | 3277602  | rs2236104   | IVS25-6      | CC           | CA           | CA     |
|                             |         |         | exon 27      | 3215239  | 3275239  | rs2281504   | Ser85Ser     | GG           | AG           | GG     |
|                             |         |         | intron 34    | 3180723  | 3240723  | rs6051685   | IVS34-49     | CC           | CG           | CG     |
|                             |         |         | intron 37    | 3176554  | 3236554  | rs117680746 | IVS37+98     | GG           | AG           | AG     |
|                             |         |         | exon 38      | 3175916  | 3235916  | rs2281496   | Lys1092Lys   | TT           | CT           | TT     |
|                             |         |         | intron 40    | 3173142  | 3233142  | rs6037516   | IVS40+76     | GG           | CC           | GC     |

**Table S3. Primers Used for Repeat-Primed PCR, Southern Blotting, and RT-PCR**

For repeat-primed PCR

| Primer name           | Primer sequence                             |
|-----------------------|---------------------------------------------|
| Forward primer        | TTTCGGCCTGCGTTCGGG                          |
| First reverse primer  | TACGCATCCCA GTTTGAGACGCA GGCCCA GGCCCA GGCC |
| Second reverse primer | TACGCATCCCA GTTTGAGACG                      |

For probes for Southern blot analysis.

| Primer name    | Primer sequence         |
|----------------|-------------------------|
| Forward primer | TTTAAGAGCTTCCAAGGCTGA   |
| Reverse primer | AGTGCCCA CAAGGAAACCGTTA |

For quantitation of mouse NOP56 cDNA

| Primer name   | Primer sequence      |
|---------------|----------------------|
| mouse NOP56 F | GTTGGCGCTGAAGGAAGTGG |
| mouse NOP56 R | CTTTGGCACGAGAGTAGCTG |

For quantitation of human NOP56 cDNA

| Primer name       | Primer sequence     |
|-------------------|---------------------|
| human NOP56 cex4F | TTGCCTTGAAAATGCCAAC |
| human NOP56 cex6R | TGTATTGCGGCCCAATCTT |

For investigation of human NOP56 cDNA splicing variants

| Primer name       | Primer sequence     |
|-------------------|---------------------|
| human NOP56 cex1F | TAGCCGATTGCGAGCCGAA |
| human NOP56 cex4R | GTTGCCTTGAAAATGCCAA |
